# Supplementary material for: Preparative Separation and Purification of Trichothecene Mycotoxins from the Marine Fungus Fusarium sp. LS68 by High-Speed Countercurrent Chromatography in Stepwise Elution Mode
Source: PubMed Central journal article supplement (PMC5852501; doi:10.3390/md16020073), 2018-02-24
Supplement: marinedrugs-16-00073-s001.pdf [file marinedrugs-16-00073-s001.pdf]

## Supplementary Materials

# Preparative Separation and Purification of Trichothecene Mycotoxins from the Marine Fungus *Fusarium* sp. LS68 by High-Speed Counter-current Chromatography in Stepwise Elution Mode

Yong Liu <sup>1</sup>, Xuezhen Zhou <sup>1</sup>, C. Benjamin Naman <sup>1,2,3</sup>, Yanbin Lu <sup>4</sup>, Lijian Ding <sup>1,2,\*</sup> and Shan He <sup>1,2,\*</sup>

<sup>1</sup> Li Dak Sum Yip Yio Chin Kenneth Li Marine Biopharmaceutical Research Center, Ningbo University, Ningbo 315211, China; E-Mails: 18892618896@163.com (Y.L.); zhouxuezhen@nbu.edu.cn (X.Z); dinglijian@nbu.edu.cn (L.D.).

<sup>2</sup> Key Laboratory of Marine Biotechnology of Zhejiang Province, Ningbo University, Ningbo, Zhejiang 315211, China;

<sup>3</sup> Center for Marine Biotechnology and Biomedicine, Scripps Institution of Oceanography and Skaggs School of Pharmacy and Pharmaceutical Sciences, University of California, San Diego, La Jolla, CA 92093, USA

<sup>4</sup> Institute of Seafood, Zhejiang Gongshang University, Hangzhou 310012, China

\* Correspondence: heshan@nbu.edu.cn (S.H.), dinglijian@nbu.edu.cn (L.D.); Tel.: +86-574-8760-0458 (S.H.).

| <b>Table of Contents</b>                                                                           | <b>page</b> |
|----------------------------------------------------------------------------------------------------|-------------|
| <b>Figure S1a.</b> <sup>1</sup> H NMR spectrum of compound <b>1</b> (CDCl <sub>3</sub> , 600 MHz)  | 3           |
| <b>Figure S1b.</b> <sup>13</sup> C NMR spectrum of compound <b>1</b> (CDCl <sub>3</sub> , 150 MHz) | 3           |
| <b>Figure S1c.</b> HRESIMS spectrum of compound <b>1</b>                                           | 4           |
| <b>Figure S1d.</b> UV spectrum of compound <b>1</b>                                                | 4           |
| <b>Figure S2a.</b> <sup>1</sup> H NMR spectrum of compound <b>2</b> (CDCl <sub>3</sub> , 600 MHz)  | 5           |
| <b>Figure S2b.</b> <sup>13</sup> C NMR spectrum of compound <b>2</b> (CDCl <sub>3</sub> , 150 MHz) | 5           |
| <b>Figure S2c.</b> HRESIMS spectrum of compound <b>2</b>                                           | 6           |
| <b>Figure S2d.</b> UV spectrum of compound <b>2</b>                                                | 6           |
| <b>Figure S3a.</b> <sup>1</sup> H NMR spectrum of compound <b>3</b> (CDCl <sub>3</sub> , 600 MHz)  | 7           |
| <b>Figure S3b.</b> <sup>13</sup> C NMR spectrum of compound <b>3</b> (CDCl <sub>3</sub> , 150 MHz) | 7           |
| <b>Figure S3c.</b> HRESIMS spectrum of compound <b>3</b>                                           | 8           |
| <b>Figure S3d.</b> UV spectrum of compound <b>3</b>                                                | 8           |
| <b>Figure S4a.</b> <sup>1</sup> H NMR spectrum of compound <b>4</b> (CDCl <sub>3</sub> , 600 MHz)  | 9           |
| <b>Figure S4b.</b> <sup>13</sup> C NMR spectrum of compound <b>4</b> (CDCl <sub>3</sub> , 150 MHz) | 9           |
| <b>Figure S4c.</b> HRESIMS spectrum of compound <b>4</b>                                           | 10          |
| <b>Figure S4d.</b> UV spectrum of compound <b>4</b>                                                | 10          |
| <b>Table S1.</b> NMR data of compound <b>1</b> in CDCl <sub>3</sub>                                | 11          |
| <b>Table S2.</b> NMR data of compound <b>2</b> in CDCl <sub>3</sub>                                | 12          |
| <b>Table S3.</b> NMR data of compound <b>3</b> in CDCl <sub>3</sub>                                | 13          |
| <b>Table S4.</b> NMR data of compound <b>4</b> in CDCl <sub>3</sub>                                | 14          |
| <b>Table S5.</b> Specific rotation values of compounds <b>1–4</b>                                  | 15          |
| <b>Table S6.</b> UV values of compounds <b>1–4</b> .                                               | 15          |

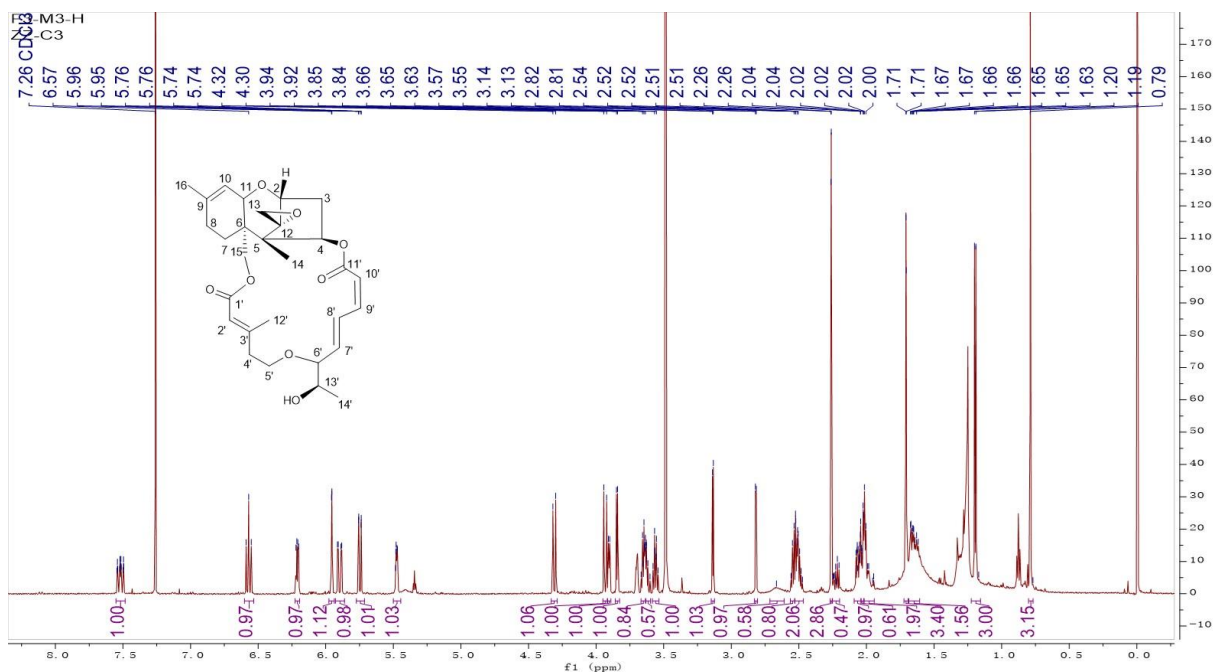

**Figure S1a.**  $^1\text{H}$  NMR spectrum of compound **1** ( $\text{CDCl}_3$ , 600 MHz)

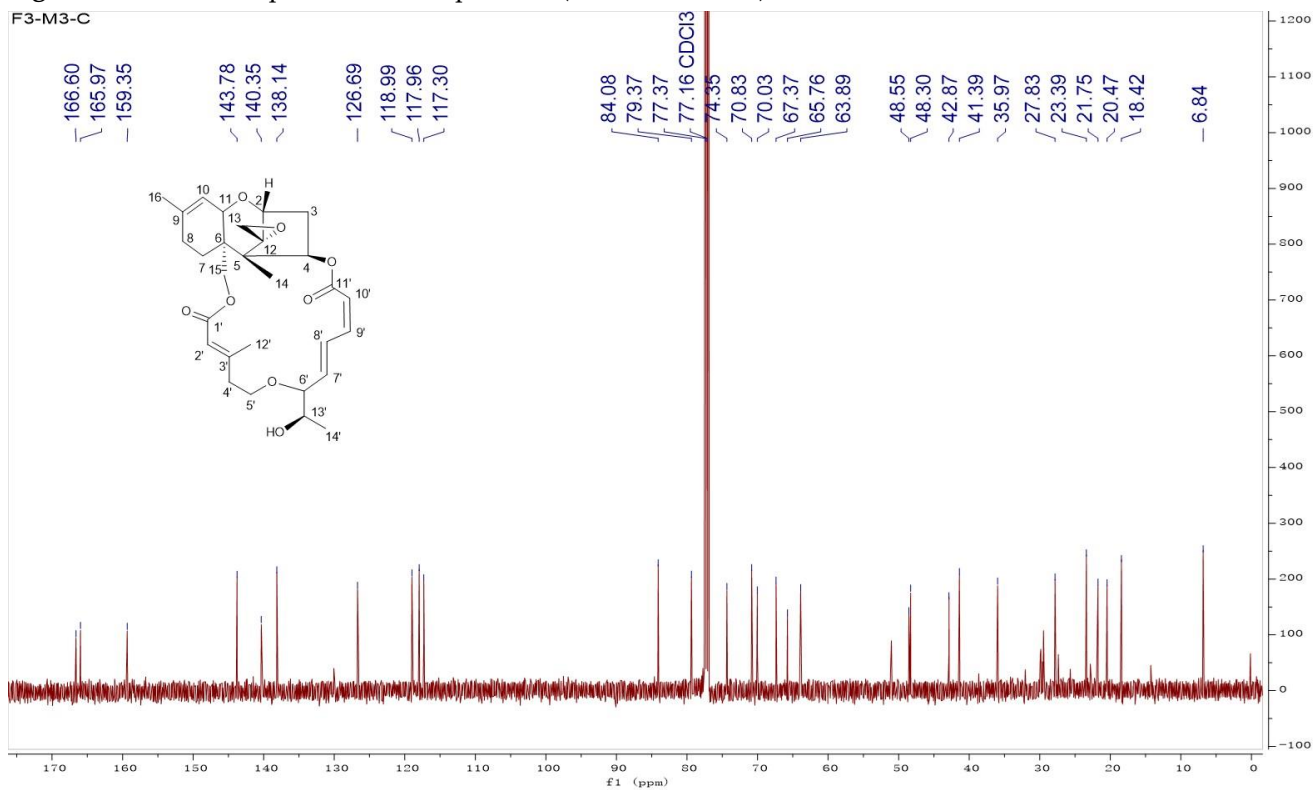

**Figure S1b.**  $^{13}\text{C}$  NMR spectrum of compound **1** ( $\text{CDCl}_3$ , 150 MHz)

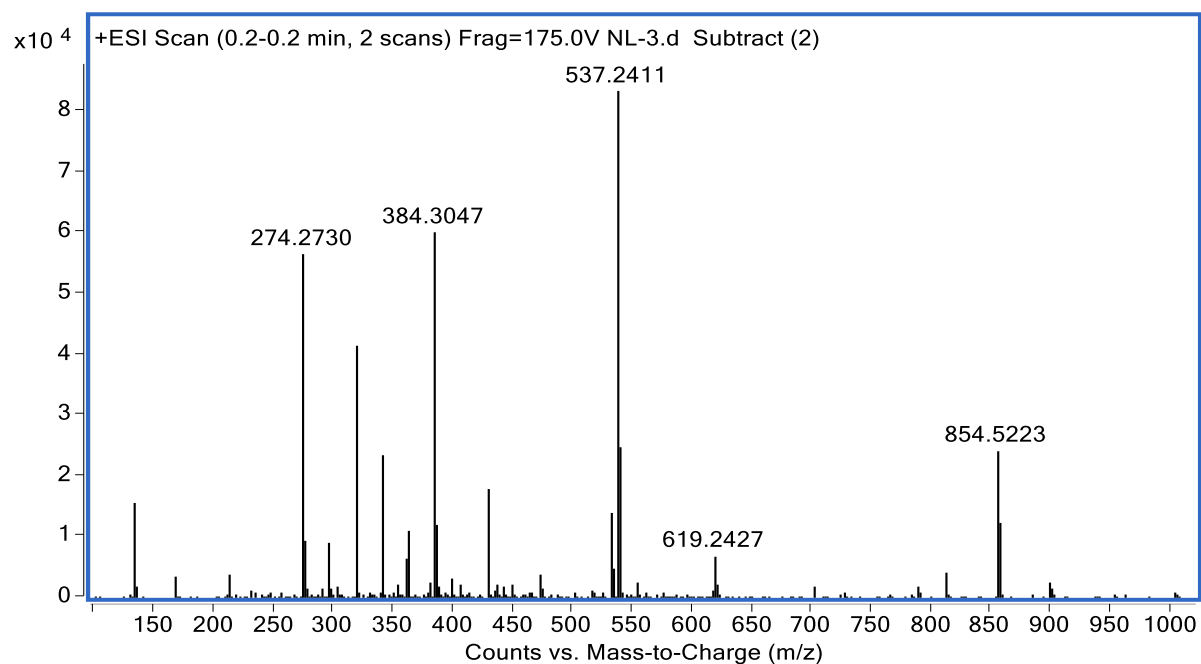

Figure S1c. HRESIMS spectrum of compound 1

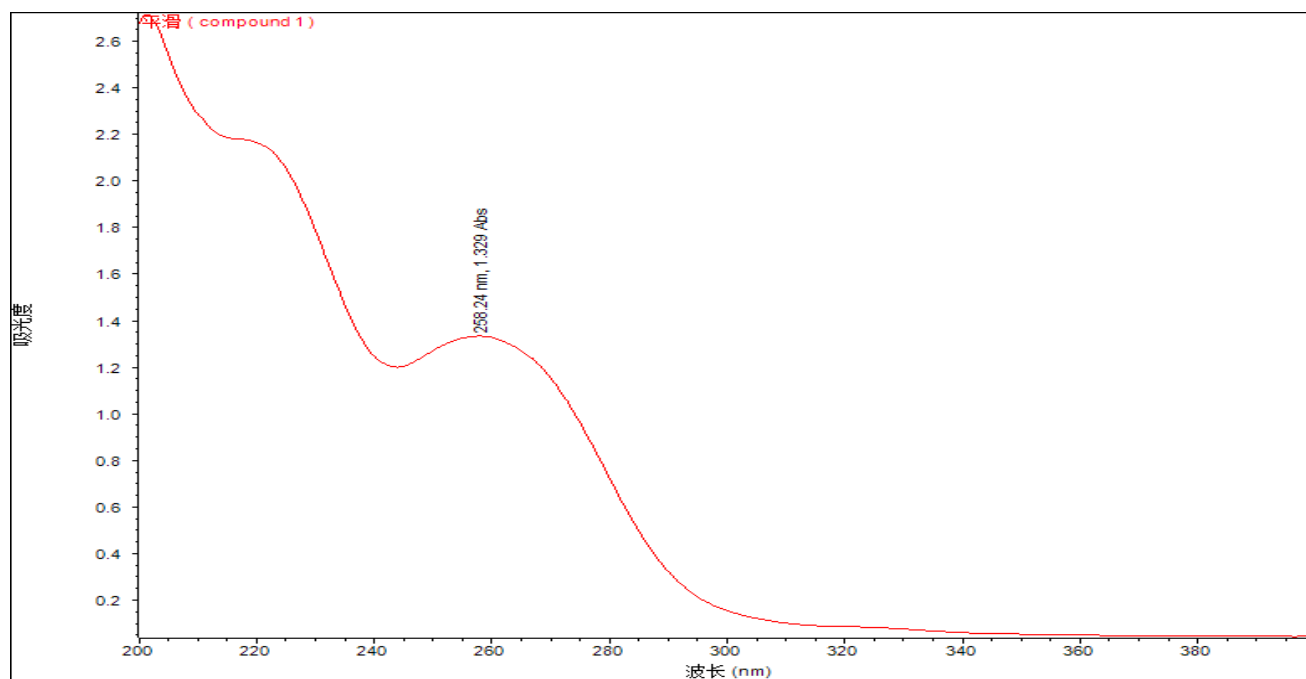

Figure S1d. UV spectrum of compound 1

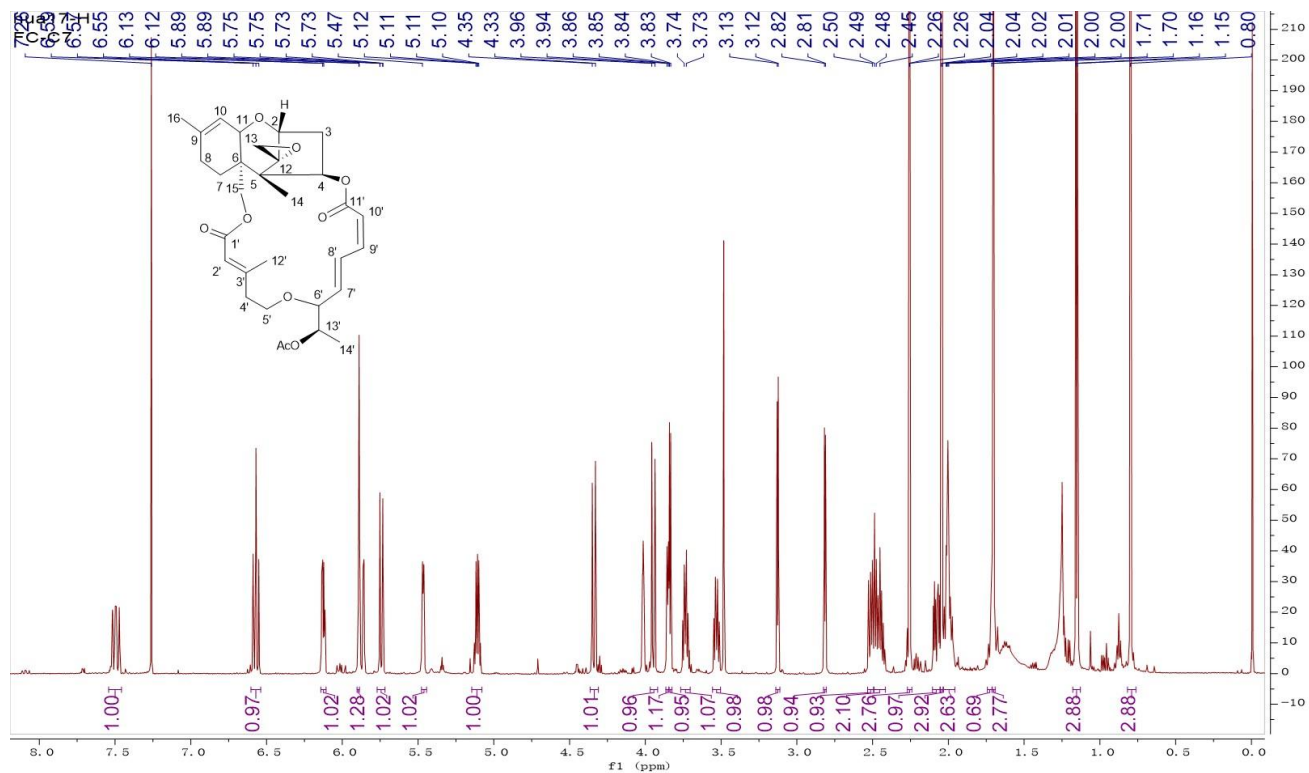

Figure S2a.  $^1\text{H}$  NMR spectrum of compound 2 ( $\text{CDCl}_3$ , 600 MHz)

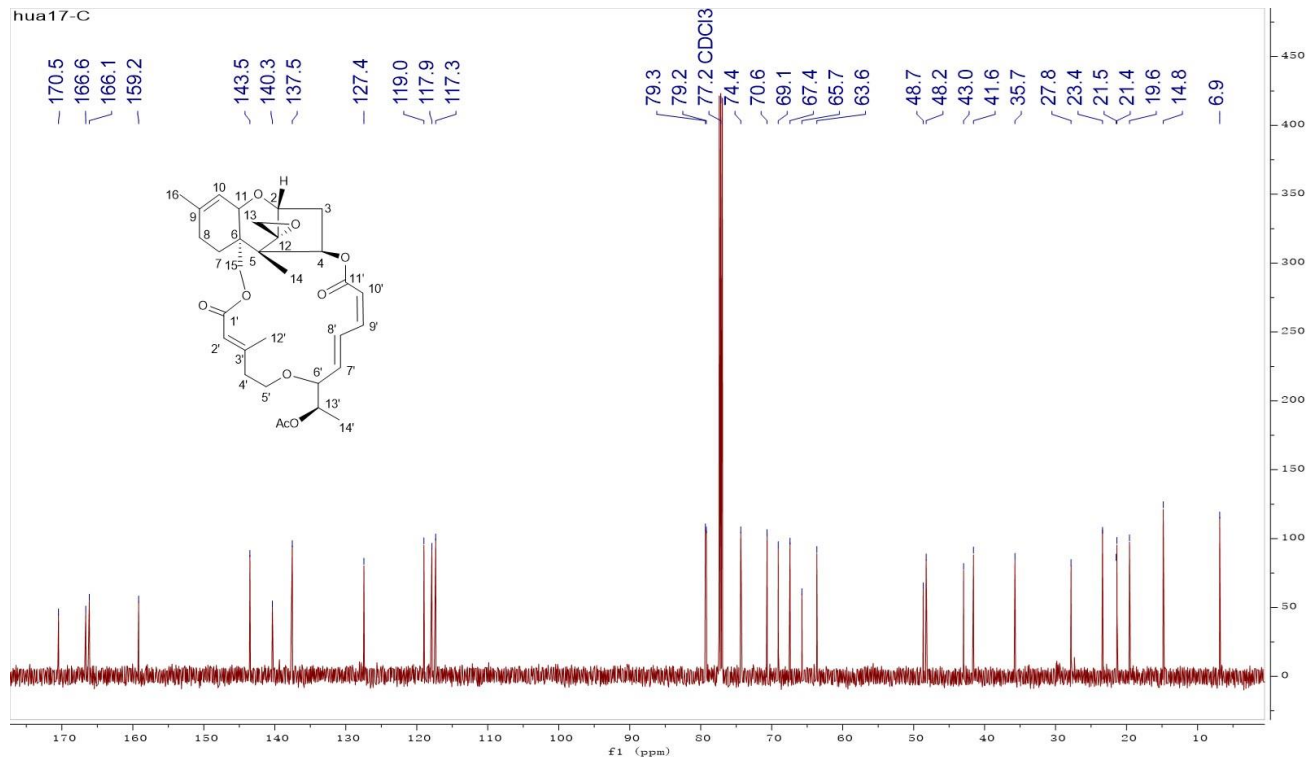

Figure S2b.  $^{13}\text{C}$  NMR spectrum of compound 2 ( $\text{CDCl}_3$ , 150 MHz)

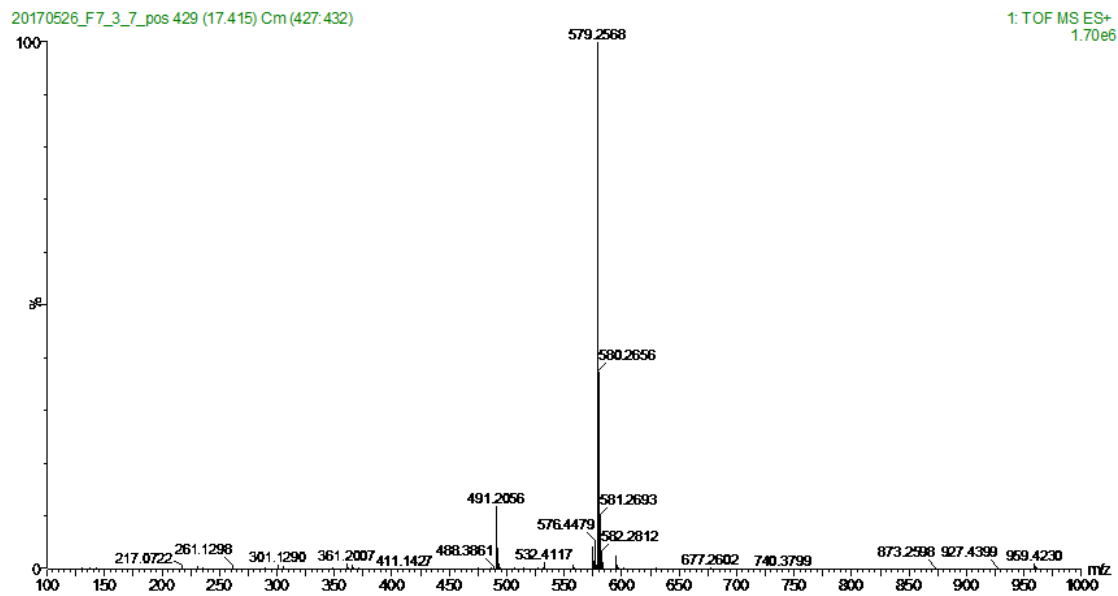

Figure S2c. HRESIMS spectrum of compound 2

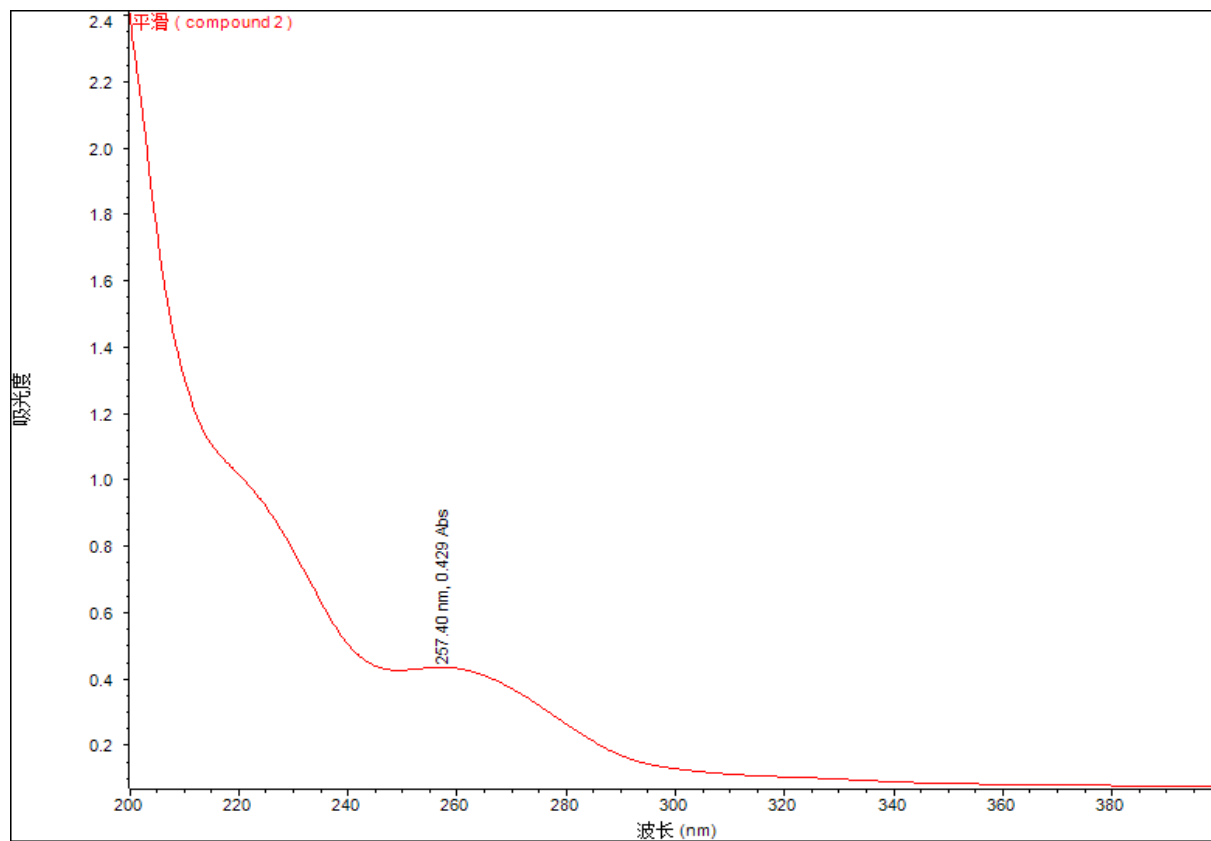

Figure S2d. UV spectrum of compound 2

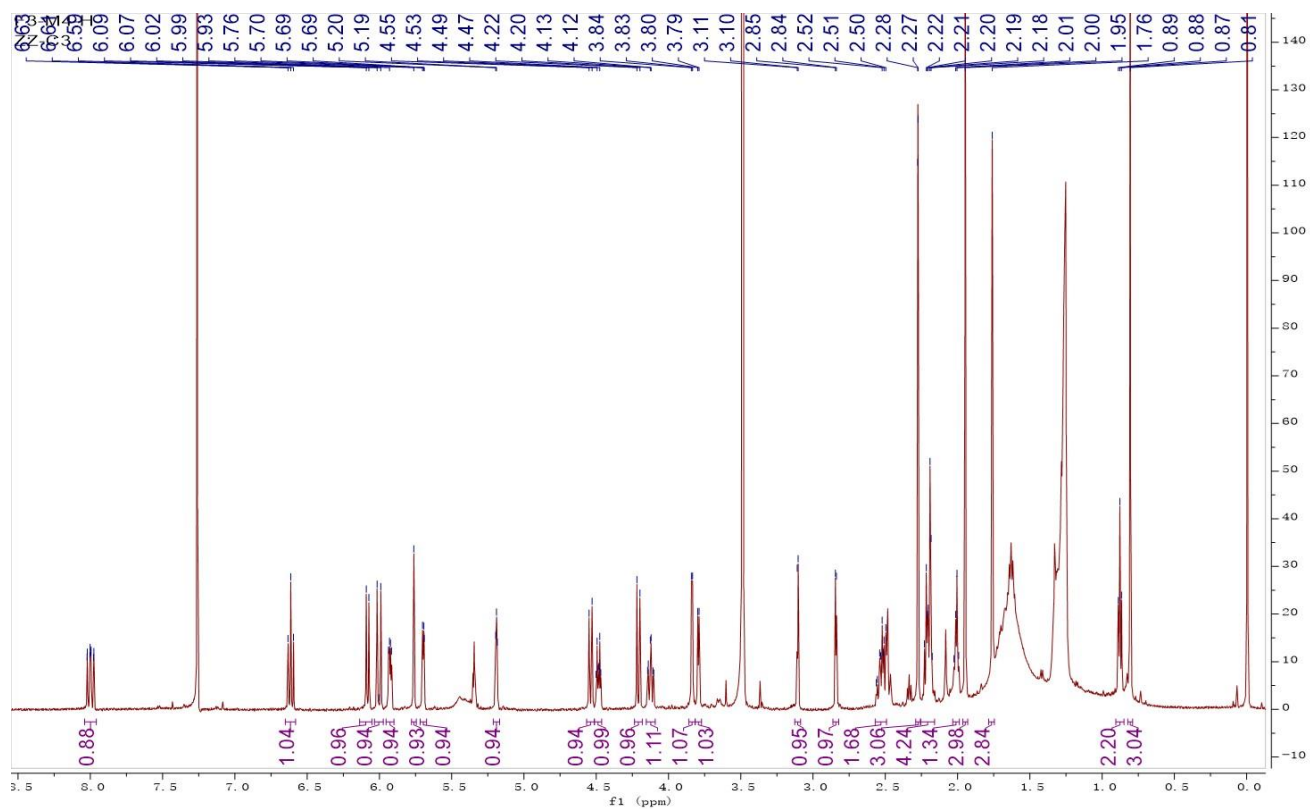

Figure S3a.  $^1\text{H}$  NMR spectrum of compound 3 ( $\text{CDCl}_3$ , 600 MHz)

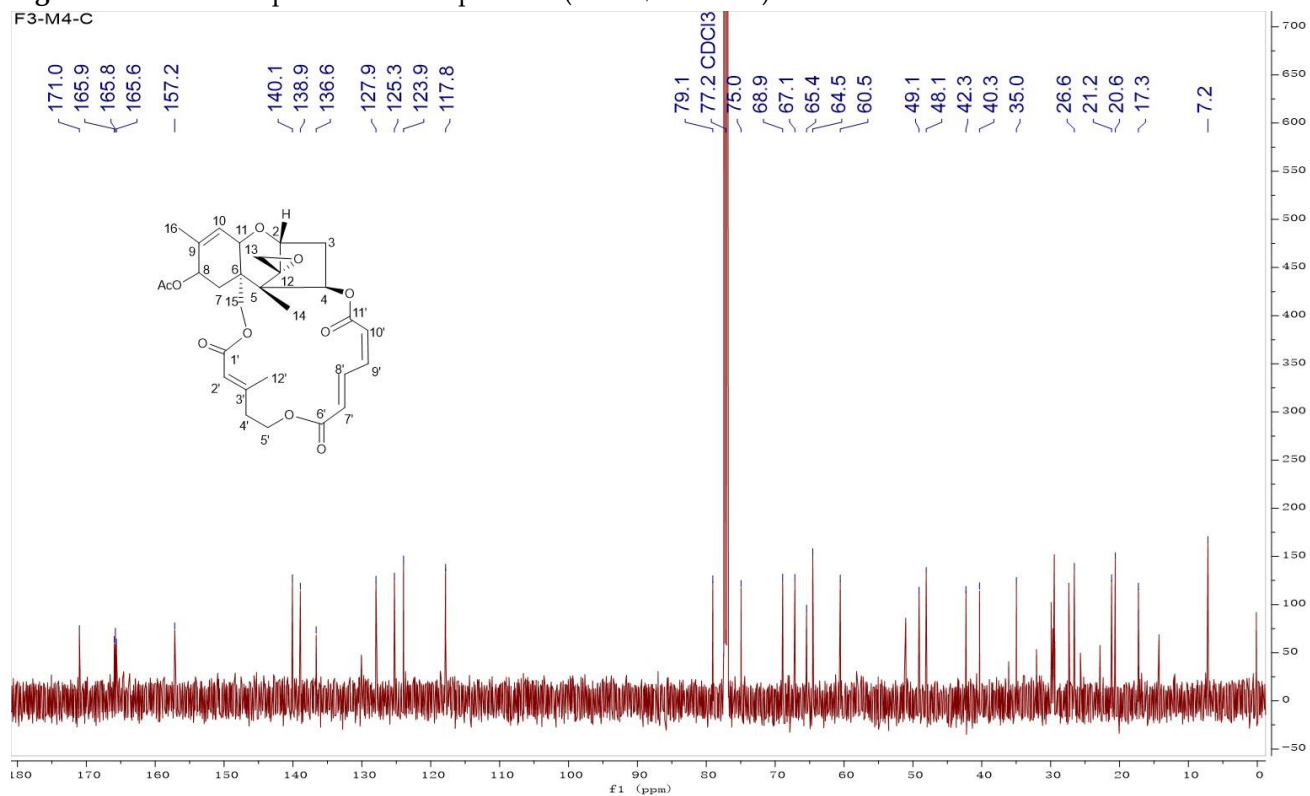

Figure S3b.  $^{13}\text{C}$  NMR spectrum of compound 3 ( $\text{CDCl}_3$ , 150 MHz)

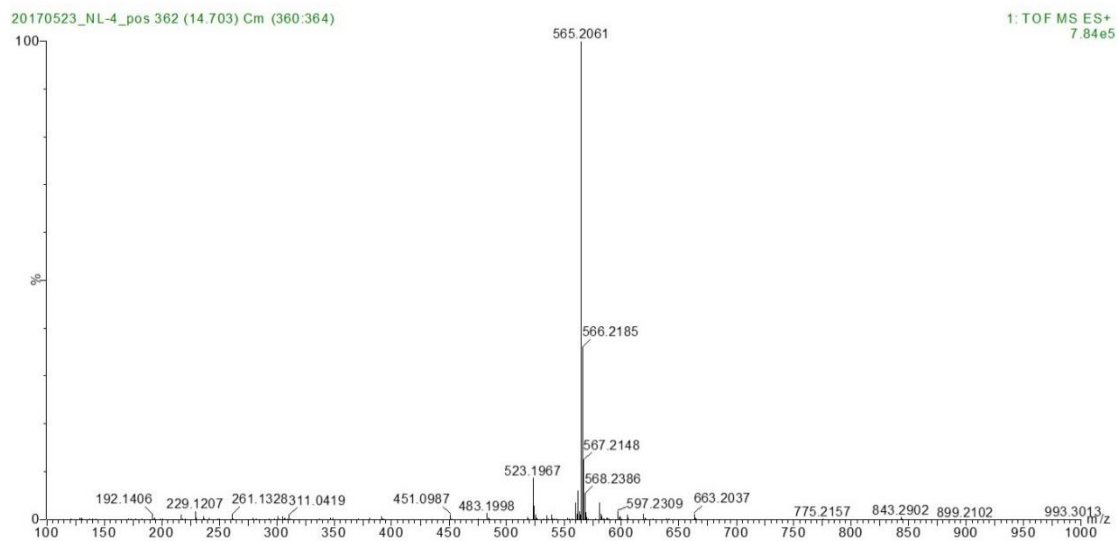

Figure S3c. HRESIMS spectrum of compound 3

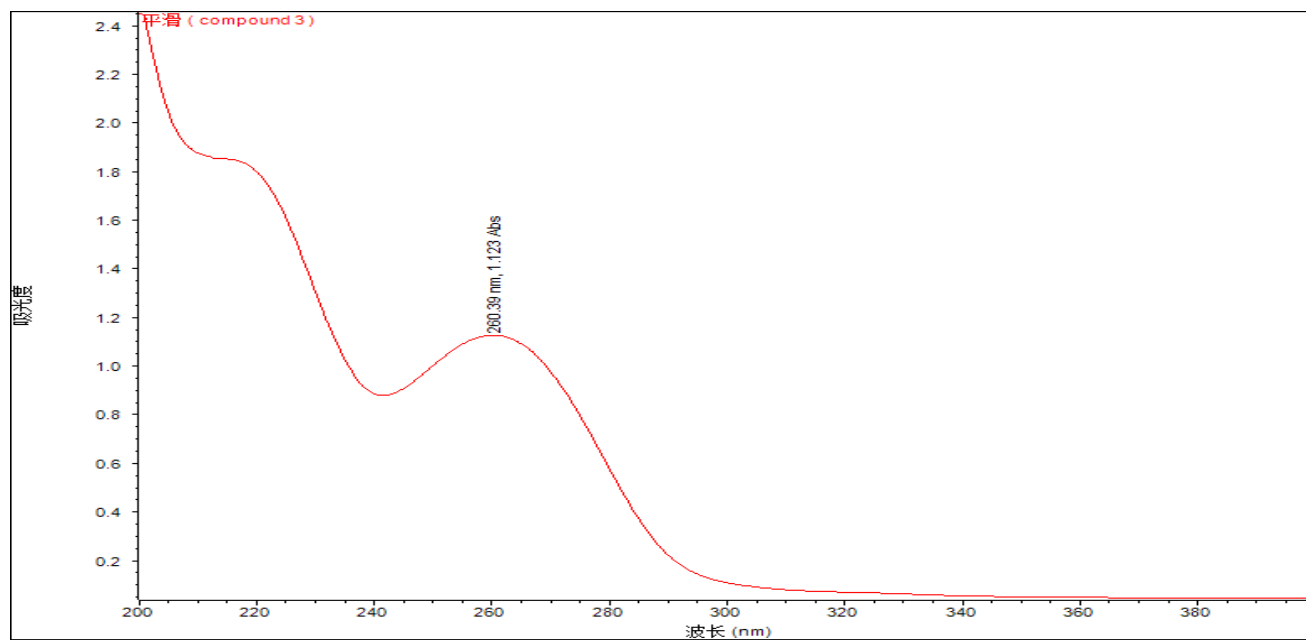

Figure S3d. UV spectrum of compound 3



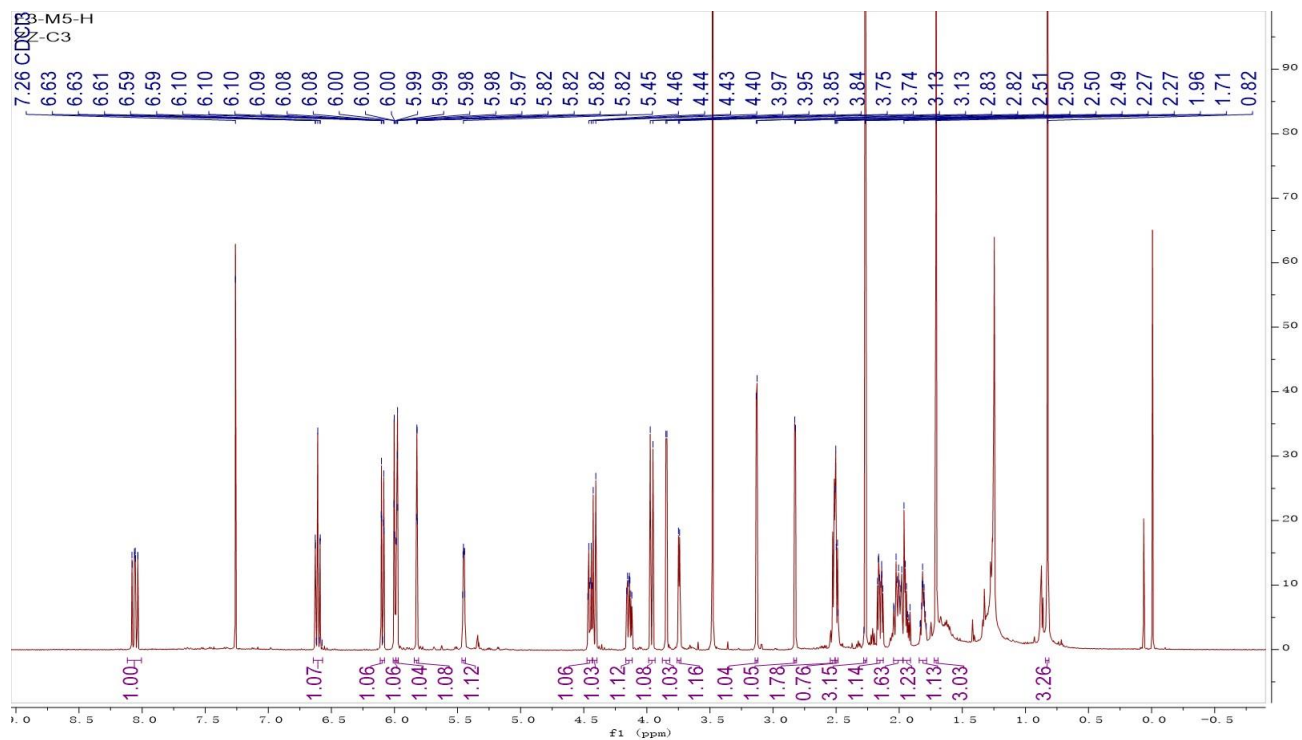

Figure S4a.  $^1\text{H}$  NMR spectrum of compound 4 ( $\text{CDCl}_3$ , 600 MHz)

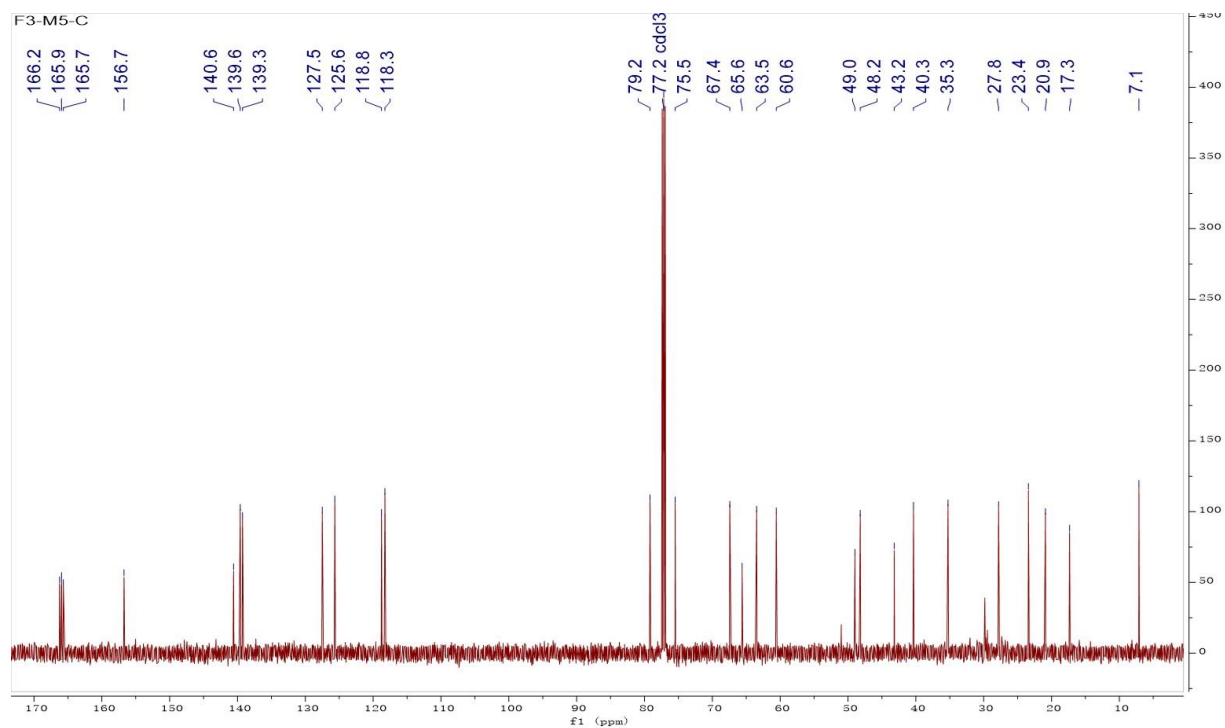

Figure S4b.  $^{13}\text{C}$  NMR spectrum of compound 4 ( $\text{CDCl}_3$ , 150 MHz)

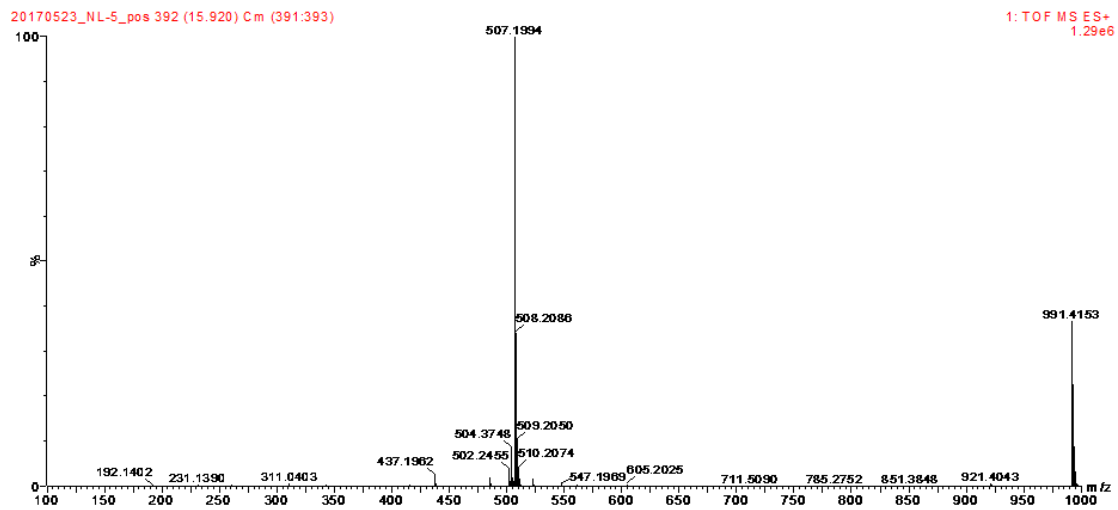

Figure S4c. HRESIMS spectrum of compound 4

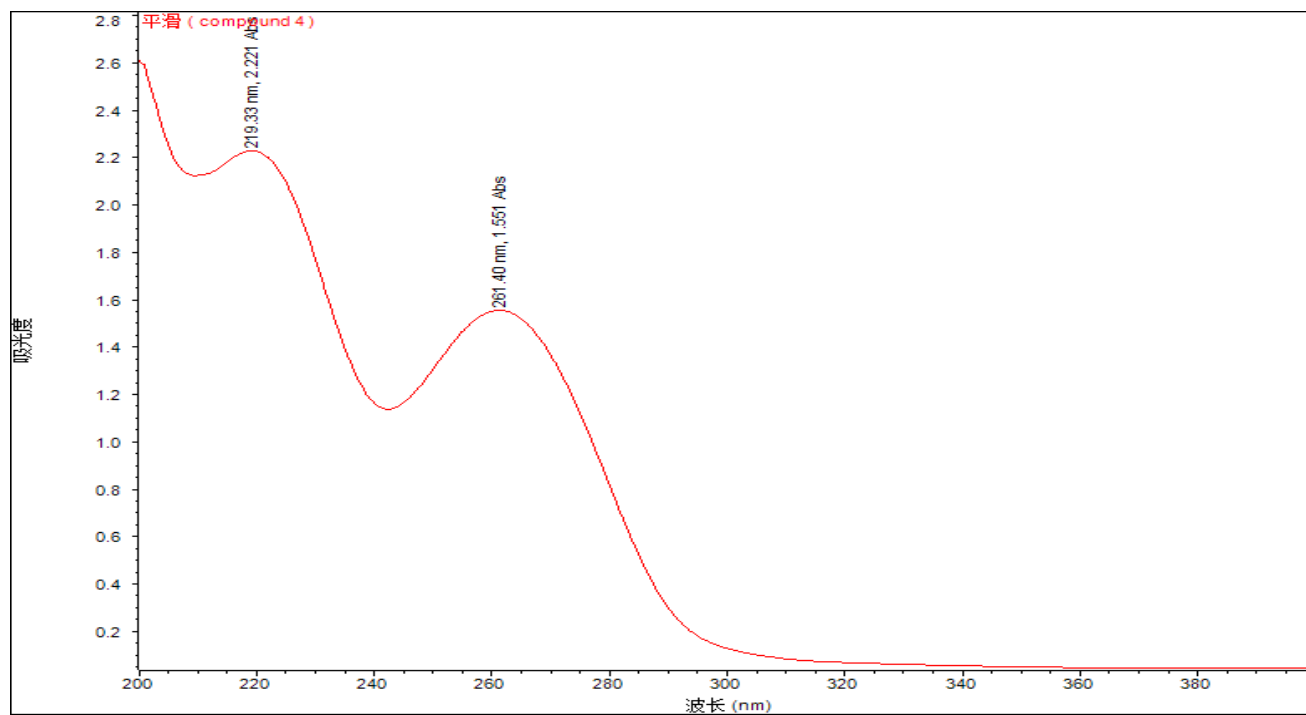

Figure S4d. UV spectrum of compound 4

**Table S1.** NMR data of compound **1** in CDCl<sub>3</sub>

| Position | literature data ( <sup>1</sup> H 600 MHz, <sup>13</sup> C 150 MHz) <sup>1</sup> |                     | experimental data( <sup>1</sup> H 600 MHz, <sup>13</sup> C 150 MHz) |                     |
|----------|---------------------------------------------------------------------------------|---------------------|---------------------------------------------------------------------|---------------------|
|          | $\delta_{\text{H}}$ (mult, <i>J</i> )                                           | $\delta_{\text{C}}$ | $\delta_{\text{H}}$ (mult, <i>J</i> )                               | $\delta_{\text{C}}$ |
| 2        | 3.83 (1H, d, 5.0 Hz)                                                            | 79.5                | 3.83 (1H, d, 5.1 Hz)                                                | 79.4                |
| 3        | 2.51 (1H, dd, 15.0, 8.0 Hz); 2.04 (1H, ddd, 15.0, 5.0, 4.0 Hz)                  | 36.1                | 2.50 (1H,m); 2.05 (1H, m)                                           | 36.0                |
| 4        | 6.20 (1H, dd, 8.0, 4.0 Hz)                                                      | 74.4                | 6.21 (1H, dd, 8.1, 3.9 Hz)                                          | 74.4                |
| 5        |                                                                                 | 48.6                |                                                                     | 48.6                |
| 6        |                                                                                 | 42.9                |                                                                     | 42.9                |
| 7        | 2.02 (1H, ddd, 12.6, 12.6, 5.5 Hz)<br>1.65 (1H, ddd, 12.6, 5.5, 1.4 Hz)         | 21.8                | 2.03 (1H, m); 1.65 (1H, m)                                          | 21.8                |
| 8        | 2.01 (1H, ddd, 12.6, 12.6, 5.5 Hz); 2.00 (1H, ddd, 12.6, 5.5, 1.4 Hz)           | 27.9                | 2.00 (2H, m)                                                        | 27.8                |
| 9        |                                                                                 | 140.4               |                                                                     | 140.4               |
| 10       | 5.46 (1H, brd)                                                                  | 119.1               | 5.48 (1H, m)                                                        | 119.0               |
| 11       | 3.89 (1H, brd)                                                                  | 67.5                | 3.90 (1H, d, 5.7 Hz)                                                | 67.4                |
| 12       |                                                                                 | 65.8                |                                                                     | 65.8                |
| 13       | 3.12 (1H, d, 4.1 Hz); 2.80 (1H, d, 4.1 Hz)                                      | 48.4                | 3.14 (1H, d, 4.1 Hz); 2.82 (1H, d, 4.0 Hz)                          | 48.3                |
| 14       | 0.77 (3H, s)                                                                    | 6.9                 | 0.79 (3H, s)                                                        | 6.8                 |
| 15       | 4.29 (1H, d, 12.5 Hz); 3.92 (1H, d, 12.5 Hz)                                    | 64.0                | 4.31 (1H, d, 12.5 Hz); 3.93 (1H, d, 12.5 Hz)                        | 63.9                |
| 16       | 1.69 (3H, brs)                                                                  | 23.5                | 1.71 (3H, m)                                                        | 23.4                |
| 1'       |                                                                                 | 166.7               |                                                                     | 166.6               |
| 2'       | 5.94 (1H, brs)                                                                  | 117.4               | 5.90 (1H, dd, 15.7, 3.4 Hz)                                         | 117.3               |
| 3'       |                                                                                 | 159.4               |                                                                     | 159.4               |
| 4'       | 2.51 (1H, dd, 13.0, 7.3, ~1.0 Hz); 2.48 (1H, dd, 13.0, 6.8, <1.0 Hz)            | 41.5                | 2.51 (2H, m)                                                        | 41.4                |
| 5'       | 3.62 (1H, ddd, 15.1, 6.8, ~1.0 Hz); 3.54 (1H, ddd, 15.1, 7.3, <1 Hz)            | 70.1                | 3.62 (1H, m); 3.56 (1H, dt, 8.4, 7.1 Hz)                            | 70.0                |
| 6'       | 3.68 (1H, br,ddq, 6.7, 3.2, 1.0 Hz)                                             | 84.2                |                                                                     | 84.1                |
| 7'       | 5.88 (1H, dd, 15.7, 3.2 Hz)                                                     | 138.2               | 5.96 (1H, d, 1.6 Hz)                                                | 138.1               |
| 8'       | 7.51 (1H, br.dd, 15.7, 11.3 Hz)                                                 | 126.8               | 7.52 (1H, ddt, 15.8, 11.4, 1.5 Hz)                                  | 126.7               |
| 9'       | 6.55 (1H, t, 11.3 Hz)                                                           | 143.9               | 6.57 (1H, t, 11.3 Hz)                                               | 143.8               |
| 10'      | 5.73 (1H, d, 11.3 Hz)                                                           | 118.1               | 5.75 (1H, dd, 11.2, Hz)                                             | 118.0               |
| 11'      |                                                                                 | 166.0               |                                                                     | 166.0               |
| 12'      | 2.24 (3H, d, 1.1 Hz)                                                            | 20.6                | 2.26 (3H, d, 1.3 Hz)                                                | 20.5                |
| 13'      | 3.63 (1H, dq, 6.7, 6.2 Hz)                                                      | 70.9                | 3.65 (1H, m)                                                        | 70.8                |
| 14'      | 1.18 (3H, d, 6.2 Hz)                                                            | 18.5                | 1.20 (3H, d, 6.3 Hz)                                                | 18.4                |
| OH-13'   | 2.62                                                                            |                     | 2.67                                                                |                     |

**Table S2.** NMR data of compound **2** in CDCl<sub>3</sub>

| Position | literature data ( <sup>1</sup> H 400 MHz, <sup>13</sup> C 100 MHz) <sup>2</sup> |                | experimental data ( <sup>1</sup> H 600 MHz, <sup>13</sup> C 150 MHz) |                |
|----------|---------------------------------------------------------------------------------|----------------|----------------------------------------------------------------------|----------------|
|          | δ <sub>H</sub> (mult, J)                                                        | δ <sub>C</sub> | δ <sub>H</sub> (mult, J)                                             | δ <sub>C</sub> |
| 2        | 3.86-3.84 (1H, m,)                                                              | 79.3           | 3.84 (1H, d, 5.2 Hz)                                                 | 79.3           |
| 3        | 2.53-2.45(1H, m); 2.09 (1H, m)                                                  | 35.7           | 2.52 (1H, m)                                                         | 35.7           |
| 4        | 6.13 (1H, dd, 8.1, 4.0 Hz)                                                      | 74.3           | 6.13 (1H, dd, 8.2, 4.1 Hz)                                           | 74.4           |
| 5        |                                                                                 | 48.6           |                                                                      | 48.7           |
| 6        |                                                                                 | 42.9           |                                                                      | 43.0           |
| 7        | 2.05-1.98 (1H, m); 1.71 (1H, m)                                                 | 21.4           | 2.03-1.98 (1H, m); 1.72 (1H, m)                                      | 21.4           |
| 8        | 2.05-1.98 (2H, m)                                                               | 27.8           | 2.03-1.98 (3H, m)                                                    | 27.8           |
| 9        |                                                                                 | 140.3          |                                                                      | 140.3          |
| 10       | 5.47 (1H, d, 5.3 Hz)                                                            | 119.0          | 5.47 (1H, dq, 5.6, 1.5 Hz)                                           | 119.0          |
| 11       | 3.86-3.84 (1H, m,)                                                              | 67.4           | 3.85 (1H, d, 5.8 Hz)                                                 | 67.4           |
| 12       |                                                                                 | 65.7           |                                                                      | 65.7           |
| 13       | 3.13 (1H, d, 4.0 Hz); 2.82 (1H, d, 4.0 Hz)                                      | 48.2           | 3.13 (1H, d, 4.1 Hz); 2.81 (1H, d, 4.1 Hz)                           | 48.2           |
| 14       | 0.80 (3H, s)                                                                    | 6.8            | 0.80 (3H, s)                                                         | 6.9            |
| 15       | 4.35 (1H, d, 12.6 Hz); 3.95 (1H, d, 12.6 Hz)                                    | 63.6           | 4.34 (1H, d, 12.6 Hz); 3.95 (1H, d, 12.6 Hz)                         | 63.6           |
| 16       | 1.68 (3H, brs)                                                                  | 23.3           | 1.70 (3H, s)                                                         | 23.4           |
| 1'       |                                                                                 | 166.1          |                                                                      | 166.1          |
| 2'       | 5.90 (1H, s)                                                                    | 117.3          | 5.89 (1H, d, 1.7 Hz)                                                 | 117.3          |
| 3'       |                                                                                 | 159.1          |                                                                      | 159.2          |
| 4'       | 2.53-2.45 (2H, m)                                                               | 41.5           | 2.46 (2H, m)                                                         | 41.6           |
| 5'       | 3.74 (1H, m); 3.53 (1H, m)                                                      | 69.0           | 3.73 (1H, m); 3.53 (1H, ddd, 8.5, 5.9, 6.8 Hz)                       | 69.1           |
| 6'       |                                                                                 | 79.2           |                                                                      | 69.0           |
| 7'       | 5.88 (1H, m)                                                                    | 137.5          | 5.89 (1H, d, 1.7 Hz)                                                 | 137.5          |
| 8'       | 7.50 (1H, m)                                                                    | 127.4          | 7.49 (1H, dddd, 15.7, 11.4, 2.0, 1.0 Hz)                             | 127.4          |
| 9'       | 6.58 (1H, dd, 11.4, 11.3 Hz)                                                    | 143.5          | 6.57 (1H, t, 11.3 Hz)                                                | 143.5          |
| 10'      | 5.75 (1H, d, 11.0 Hz)                                                           | 117.9          | 5.74 (1H, dd, 11.2, 0.9 Hz)                                          | 117.9          |
| 11'      |                                                                                 | 166.6          |                                                                      | 166.6          |
| 12'      | 2.26 (3H, s)                                                                    | 19.5           | 2.26 (3H, d, 1.3 Hz)                                                 | 19.6           |
| 13'      | 5.12 (1H, qd, 6.3, 4.9 Hz)                                                      | 70.6           | 5.11 (1H, qd, 6.4, 4.7 Hz)                                           | 70.6           |
| 14'      | 1.16 (3H, d, 6.5 Hz)                                                            | 14.8           | 1.15 (3H, d, 6.4 Hz)                                                 | 14.8           |
| 15'      |                                                                                 | 170.4          |                                                                      | 170.5          |
| 16'      | 2.05 (3H, s)                                                                    | 21.3           | 2.04 (3H, s)                                                         | 21.5           |

**Table S3.** NMR data of compound **3** in CDCl<sub>3</sub>

| Position | literature data ( <sup>1</sup> H 400 MHz, <sup>13</sup> C 100 MHz) <sup>3</sup> |                     | experimental data ( <sup>1</sup> H 600 MHz, <sup>13</sup> C 150 MHz) |                     |
|----------|---------------------------------------------------------------------------------|---------------------|----------------------------------------------------------------------|---------------------|
|          | $\delta_{\text{H}}$ (mult, J)                                                   | $\delta_{\text{C}}$ | $\delta_{\text{H}}$ (mult, J)                                        | $\delta_{\text{C}}$ |
| 2        | 3.83 (1H, d, 5.0 Hz)                                                            | 78.9                | 3.84 (1H, d, 5.1 Hz)                                                 | 79.1                |
| 3        | 2.21 (1H, m); 2.49 (1H, m)                                                      | 34.9                | 2.21 (1H, m); 2.48 (1H, m)                                           | 35.0                |
| 4        | 5.93 (1H, dd, 8.0, 4.0 Hz)                                                      | 74.8                | 5.93 (1H, dd, 8.4, 4.3 Hz)                                           | 75.0                |
| 5        |                                                                                 | 49.0                |                                                                      | 49.1                |
| 6        |                                                                                 | 42.2                |                                                                      | 42.3                |
| 7        | 2.19 (2H, m)                                                                    | 26.5                | 2.19 (2H, d, 4.5 Hz)                                                 | 26.6                |
| 8        | 5.19 (1H, m)                                                                    | 68.8                | 5.19 (1H, t, 3.2 Hz)                                                 | 68.9                |
| 9        |                                                                                 | 136.5               |                                                                      | 136.6               |
| 10       | 5.70 (1H, brd, 5.5 Hz)                                                          | 123.8               | 5.70 (1H, d, 5.4 Hz)                                                 | 123.9               |
| 11       | 3.80 (1H, d, 5.5 Hz)                                                            | 67.0                | 3.84 (1H, d, 5.1 Hz)                                                 | 67.1                |
| 12       |                                                                                 | 65.3                |                                                                      | 65.4                |
| 13       | 2.84 (1H, d, 4.0 Hz);<br>3.11 (1H, d, 4.0 Hz)                                   | 47.9                | 2.84 (1H, d, 4.0 Hz);<br>3.11 (1H, d, 4.0 Hz)                        | 48.1                |
| 14       | 0.81 (3H, s)                                                                    | 7.0                 | 0.81 (3H, s)                                                         | 7.2                 |
| 15       | 4.21 (1H, d, 12.5 Hz);<br>4.54 (1H, d, 12.5 Hz)                                 | 64.4                | 4.21 (1H, d, 12.5 Hz);<br>4.54 (1H, d, 12.5 Hz)                      | 64.5                |
| 16       | 1.76 (3H, s)                                                                    | 20.5                | 1.76 (3H, s)                                                         | 20.6                |
| 17       |                                                                                 | 170.9               |                                                                      | 171.0               |
| 18       | 1.95 (3H, s)                                                                    | 21.0                | 1.95 (3H, s)                                                         | 21.2                |
| 1'       |                                                                                 | 165.6               |                                                                      | 165.8               |
| 2'       | 5.77 (1H, brs)                                                                  | 117.7               | 5.76 (1H, s)                                                         | 117.8               |
| 3'       |                                                                                 | 157.0               |                                                                      | 157.2               |
| 4'       | 2.54 (2H, m)                                                                    | 40.2                | 2.52 (2H, m)                                                         | 40.3                |
| 5'       | 4.13 (1H, ddd, 11.0, 11.0, 3.5 Hz)<br>4.49 (1H, ddd, 11.0, 4.0, 4.0 Hz)         | 60.4                | 4.12 (1H, td, 11.2, 3.4 Hz)<br>4.48 (1H, dt, 11.4, 4.0, 4.2 Hz)      | 60.5                |
| 6'       |                                                                                 | 165.5               |                                                                      | 165.6               |
| 7'       | 6.01 (1H, d, 15.5 Hz)                                                           | 127.8               | 6.00 (1H, d, 15.7 Hz)                                                | 127.9               |
| 8'       | 8.00 (1H, dd, 15.5, 11.5 Hz)                                                    | 138.8               | 8.00 (1H, ddd, 15.5, 11.5, 1.1 Hz)                                   | 138.9               |
| 9'       | 6.62 (1H, dd, 11.5, 10.5 Hz)                                                    | 139.9               | 6.61 (1H, t, 11.3 Hz)                                                | 140.1               |
| 10'      | 6.09 (1H, d, 10.5 Hz)                                                           | 125.1               | 6.08 (1H, d, 11.1 Hz)                                                | 125.3               |
| 11'      |                                                                                 | 165.8               |                                                                      | 165.9               |
| 12'      | 2.28 (3H, d, 1.0 Hz)                                                            | 17.1                | 2.27 (3H, d, 1.2 Hz)                                                 | 17.3                |

**Table S4.** NMR data of compound **4** in CDCl<sub>3</sub>

| Position | literature data ( <sup>1</sup> H 400 MHz, <sup>13</sup> C 100 MHz) <sup>3</sup> |                     | experimental data ( <sup>1</sup> H 600 MHz, <sup>13</sup> C 150 MHz) |                     |
|----------|---------------------------------------------------------------------------------|---------------------|----------------------------------------------------------------------|---------------------|
|          | $\delta_{\text{H}}$ (mult, <i>J</i> )                                           | $\delta_{\text{C}}$ | $\delta_{\text{H}}$ (mult, <i>J</i> )                                | $\delta_{\text{C}}$ |
| 2        | 3.88 (1H, d, 5.0 Hz)                                                            | 79.0                | 3.84 (1H, d, 5.1 Hz)                                                 | 79.2                |
| 3        | 2.16 (1H, m); 2.45 (1H, m)                                                      | 35.1                | 2.15 (1H, ddd, 15.3, 5.2, 4.2 Hz); 2.50 (1H, m)                      | 35.3                |
| 4        | 6.00 (1H, m)                                                                    | 75.3                | 6.00 (1H, m)                                                         | 75.5                |
| 5        |                                                                                 | 48.8                |                                                                      | 49.0                |
| 6        |                                                                                 | 43.0                |                                                                      | 43.2                |
| 7        | 1.84 (1H, m) 1.98 (1H, m)                                                       | 20.8                | 1.81 (1H, m); 1.94 (1H, m)                                           | 20.9                |
| 8        | 2.00 (2H, m)                                                                    | 27.7                | 2.01 (2H, m)                                                         | 27.8                |
| 9        |                                                                                 | 140.4               |                                                                      | 140.6               |
| 10       | 5.28 (1H, brd, 5.0 Hz)                                                          | 118.6               | 5.45 (1H, dq, 5.5, 3.3, 1.5 Hz)                                      | 118.3               |
| 11       | 3.68 (1H, d, 5.5 Hz)                                                            | 67.3                | 3.74 (1H, d, 5.5 Hz)                                                 | 67.4                |
| 12       |                                                                                 | 65.5                |                                                                      | 65.6                |
| 13       | 2.83 (1H, d, 4.0 Hz); 3.12 (1H, d, 4.0 Hz)                                      | 48.1                | 2.82 (1H, d, 4.0 Hz); 3.13 (1H, d, 4.0 Hz)                           | 48.2                |
| 14       | 0.83 (3H, s)                                                                    | 7.00                | 0.82 (3H, s)                                                         | 7.1                 |
| 15       | 3.98 (1H, d, 12.5 Hz); 4.42 (1H, d, 12.5 Hz)                                    | 63.3                | 3.96 (1H, d, 12.6 Hz); 4.41 (1H, d, 12.6 Hz)                         | 63.5                |
| 16       | 1.72 (3H, s)                                                                    | 23.3                | 1.71 (3H, s)                                                         | 23.4                |
| 1'       |                                                                                 | 166.1               |                                                                      | 166.2               |
| 2'       | 5.83 (1H, s)                                                                    | 118.1               | 5.82 (1H, q, 1.2 Hz)                                                 | 118.8               |
| 3'       |                                                                                 | 156.6               |                                                                      | 156.7               |
| 4'       | 2.53 (2H, m)                                                                    | 40.2                | 2.51 (2H, m)                                                         | 40.3                |
| 5'       | 4.15 (1H, m); 4.44 (1H, m)                                                      | 60.4                | 4.14 (1H, ddd, 11.3, 9.0, 4.3 Hz); 4.45 (1H, dt, 11.3, 4.6 Hz)       | 60.6                |
| 6'       |                                                                                 | 165.5               |                                                                      | 165.9               |
| 7'       | 6.02 (1H, d, 15.5 Hz)                                                           | 127.4               | 6.09 (1H, dt, 11.1, 0.9 Hz)                                          | 127.5               |
| 8'       | 8.09 (1H, dd, 15.5, 11.2 Hz)                                                    | 139.1               | 8.06 (1H, ddd, 15.7, 11.6, 1.1 Hz)                                   | 139.3               |
| 9'       | 6.62 (1H, dd, 11.2, 11.0 Hz)                                                    | 139.5               | 6.60 (1H, m)                                                         | 139.6               |
| 10'      | 6.10 (1H, d, 11.0 Hz)                                                           | 125.5               | 6.09 (1H, dt, 11.1, 0.9 Hz)                                          | 125.6               |
| 11'      |                                                                                 | 165.8               |                                                                      | 165.9               |
| 12'      | 2.28 (3H, d, 1.5 Hz)                                                            | 17.2                | 2.27 (3H, d, 1.3 Hz)                                                 | 17.3                |

**Table S5.** Specific rotation values of compounds 1–4.

| compound | literature data                                                          | experimental data                                                     |
|----------|--------------------------------------------------------------------------|-----------------------------------------------------------------------|
| <b>1</b> | $[\alpha]_{\text{D}}^{22.5} -22$ ( <i>c</i> 0.3, CHCl <sub>3</sub> )[5]  | $[\alpha]_{\text{D}}^{21} -25$ ( <i>c</i> 0.3, CHCl <sub>3</sub> )    |
| <b>2</b> | $[\alpha]_{\text{D}}^{23} +50$ ( <i>c</i> 0.85, CHCl <sub>3</sub> )[2]   | $[\alpha]_{\text{D}}^{21} +52.5$ ( <i>c</i> 0.25, CHCl <sub>3</sub> ) |
| <b>3</b> | $[\alpha]_{\text{D}}^{27} +29.7$ ( <i>c</i> 0.52, CHCl <sub>3</sub> )[4] | $[\alpha]_{\text{D}}^{22} +28$ ( <i>c</i> 0.3, CHCl <sub>3</sub> )    |
| <b>4</b> | $[\alpha]_{\text{D}}^{21} +8.1$ ( <i>c</i> 0.2, CHCl <sub>3</sub> )[5]   | $[\alpha]_{\text{D}}^{21} +6.7$ ( <i>c</i> 0.1, CHCl <sub>3</sub> )   |

**Table S6.** UV values of compounds 1–4.

| compound | literature data ( $\lambda_{\text{max}}$ MeOH) | experimental data( $\lambda_{\text{max}}$ MeOH) |
|----------|------------------------------------------------|-------------------------------------------------|
| <b>1</b> | 263[5]                                         | 258                                             |
| <b>2</b> | 262[2]                                         | 257                                             |
| <b>3</b> | 262[3]                                         | 260                                             |
| <b>4</b> | 263[3]                                         | 261                                             |

## References

- Ridge, C. D.; Mazzola, E. P.; Colesb, M. P.; Hinkley, S. F. R. Isolation and characterization of roridin E. *Magn. Reson. Chem.* **2016**, *55*, 337–340.
- Isaka, M.; Punya, J.; Lertwerawat, Y.; Tanticharoen, M.; Thebtaranonth, Y. Antimalarial activity of macrocyclic trichothecenes isolated from the fungus *Myrothecium verrucaria*. *J. Nat. Prod.* **1999**, *62*, 329–331.
- Namikoshi, M.; Kobayashi, H.; Yoshimoto, T.; Meguro, S.; Akano, K. Isolation and characterization of bioactive metabolites from marine-derived filamentous fungi collected from tropical and sub-tropical coral reefs. *Chem. Pharm. Bull.* **2000**, *48*, 1452–1457.
- Jarvis, B. B.; Midiwo, J. O.; Desilva, T.; Mazzola, E. P. Verrucarin L, a new macrocyclic trichothecene. *J. Antibiot.* **1981**, *34*, 120–121.
- Saikawa, Y.; Okamoto, H.; Inui, T.; Makabe, M.; Okuno, T.; Suda, T.; Hashimoto, T.; Nakata, M. Toxic principles of a poisonous mushroom *podostroma cornu-damae*. *Tetrahedron* **2001**, *57*, 8277–8281.
